# Supplementary material for: Electroporation followed by electrochemical measurement of quantal transmitter release from single cells using a patterned microelectrode
Source: Royal Society of Chemistry journal article supplement (doi:10.1039/c3lc41324a), 2013-01-01
Supplement: c3lc41324a.pdf [file c3lc41324a.pdf]

## Supplement

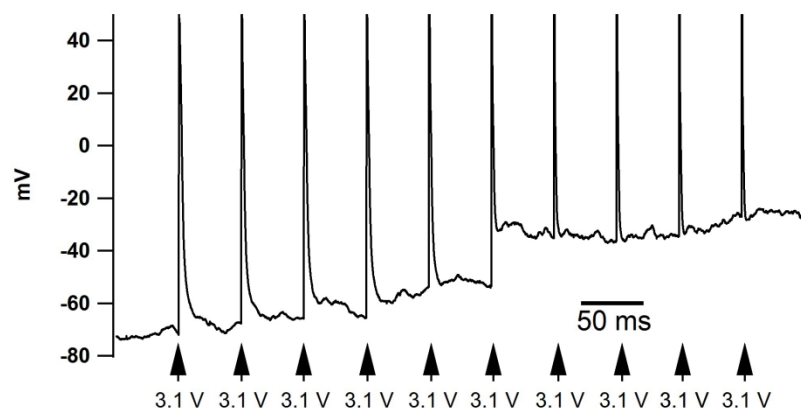

Fig. S1. Repetitive pulses lead to decreases in membrane resistance. Trains of voltage pulses were applied to chromaffin cells in order to stimulate trains of action potentials recorded with a patch-clamp pipette in current-clamp mode. The abrupt and continued steady-state depolarization after the sixth pulse is attributable to a drop in the membrane resistance.

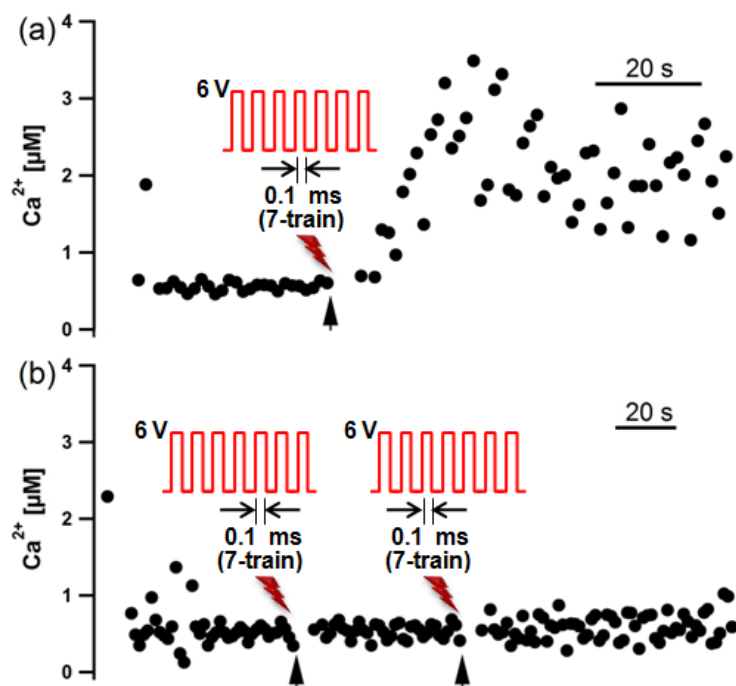

Fig. S2. Voltage pulses do not appear to release  $\text{Ca}^{2+}$  from internal stores. (a) Sample response where the stimulus protocol leads to a pronounced increase in  $[\text{Ca}^{2+}]_i$  when the bath contains 2 mM  $\text{CaCl}_2$ . Similar increases in  $[\text{Ca}^{2+}]_i$  were seen in two other cells, whereas two others did not show a clear increases in  $[\text{Ca}^{2+}]_i$ . (b) Sample recording where the stimulus protocol leads to no discernible increase in  $[\text{Ca}^{2+}]_i$  when the bath solution contained zero added  $\text{Ca}^{2+}$  and 5 mM EGTA. Similarly, no discernible  $[\text{Ca}^{2+}]_i$  increases were seen in four other cells in response to the stimulus protocol.
